# Supplementary material
Source: Springer Nature journal article supplement (https://www.springermedizin.de/resource/supplementary/13024_2014_540_MOESM4_ESM.pdf/9644348)
Supplement: MOESM4 [file 9644348]

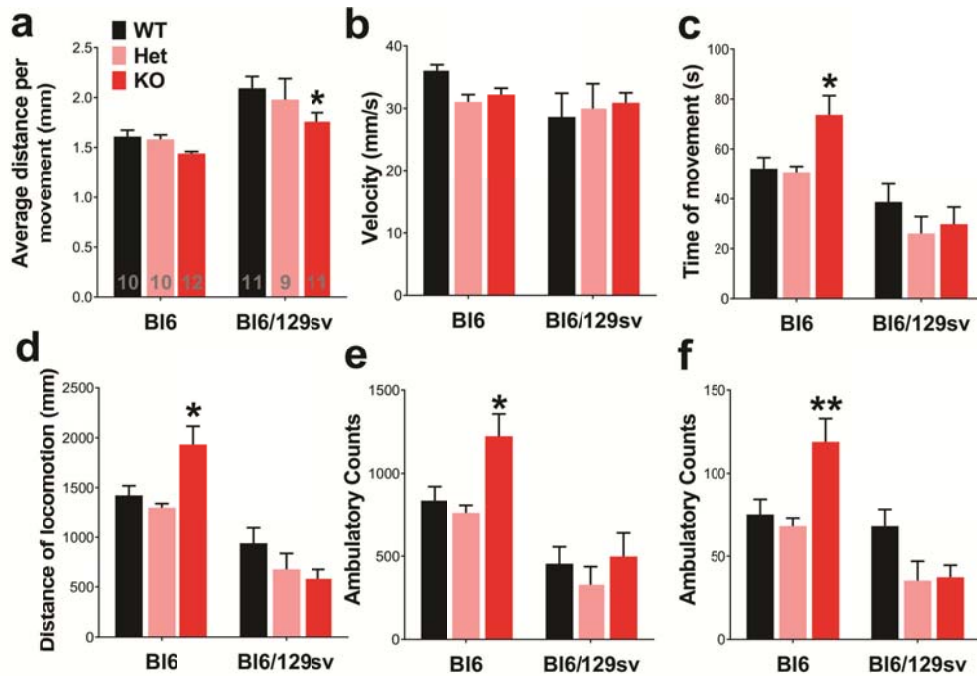

**Figure S4.** Analysis of movement during first 10mins in Open field. **a)** Average distance per movement. Two-way ANOVA: genotype ( $p = 0.0155$ ) and genetic background ( $p < 0.0001$ ) effects but no interaction ( $p = 0.636$ ). **b)** Velocity. Two-way ANOVA: no genetic background ( $p = 0.09$ ), or genotype effects ( $p = 0.749$ ), or interaction ( $p = 0.318$ ). **c)** Time of movement. Two-way ANOVA: genetic background ( $p < 0.0001$ ) effects, but no genotype effect ( $p = 0.1375$ ) or interaction ( $p = 0.054$ ). **d)** Distance of locomotion. Two-way ANOVA: genetic background effect ( $p < 0.0001$ ) and interaction ( $p = 0.005$ ), but no genotype effect ( $p = 0.1707$ ). **e)** Ambulatory counts of movement in the central field. Two-way ANOVA: genotype ( $p < 0.022$ ) and genetic background ( $p < 0.0001$ ) effects, but no interaction ( $p = 0.244$ ). **f)** Ambulatory counts of movement in the peripheral field. Two-way ANOVA: genotype ( $p = 0.035$ ) and genetic background ( $p < 0.0001$ ) effects, plus interaction ( $p = 0.002$ ). \*  $p < 0.05$ , \*\*  $p < 0.01$ , \*\*\*  $p < 0.001$ , versus age-matched wild type mice (Bonferroni post hoc test). n as indicated. Data are means  $\pm$  SEM.
